# Supplementary material for: Mechanistic insights into SIRT7 and EZH2 regulation of cisplatin resistance in bladder cancer cells
Source: Cell Death Dis. 2024 Dec 24;15(12):931. doi: 10.1038/s41419-024-07321-1 (PMC11668892; doi:10.1038/s41419-024-07321-1)

Figure 2A

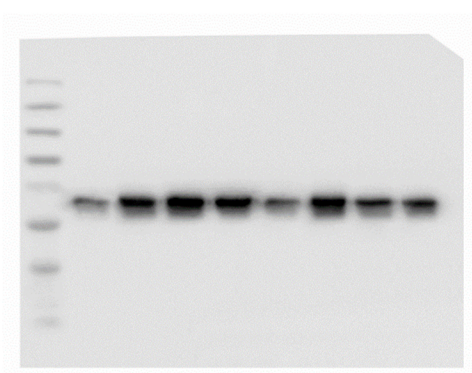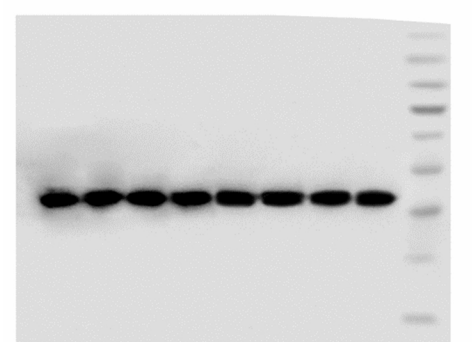

Figure 5A

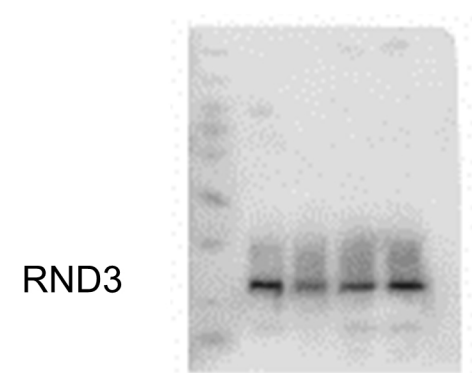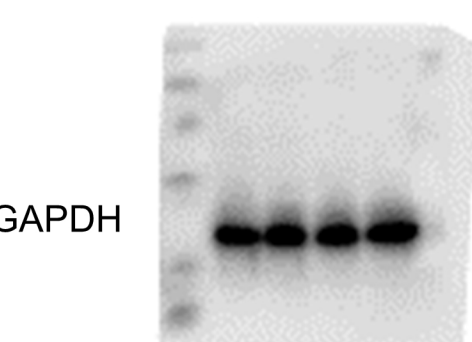

Figure 6D

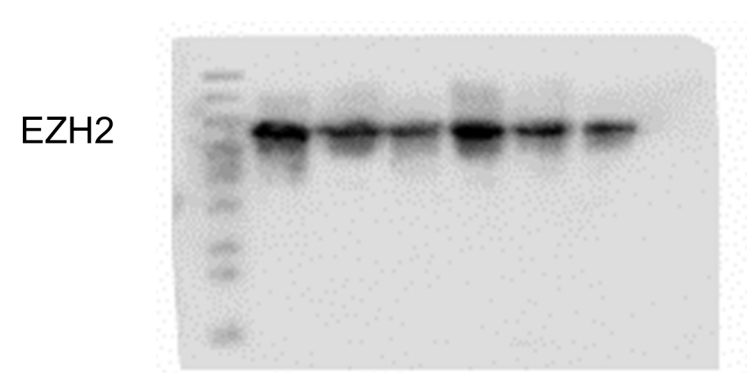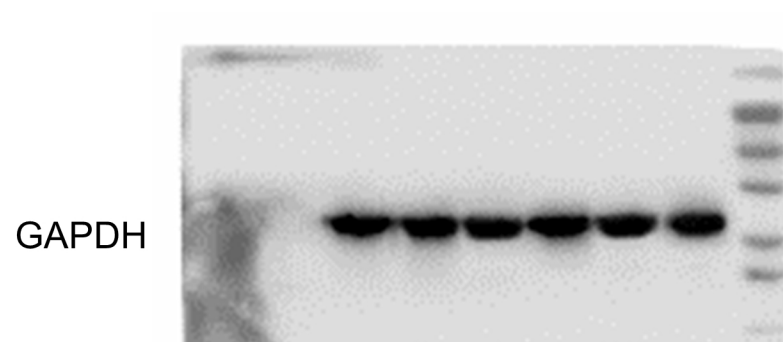

Figure 7G

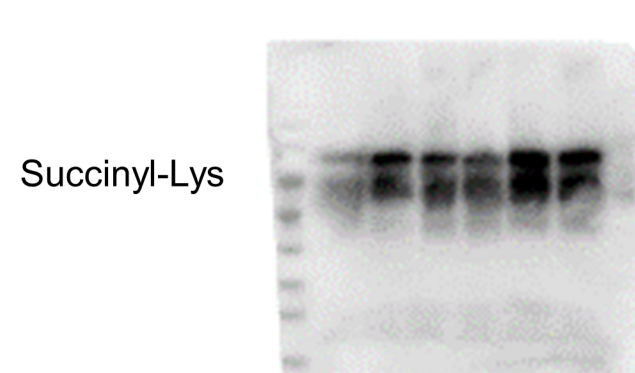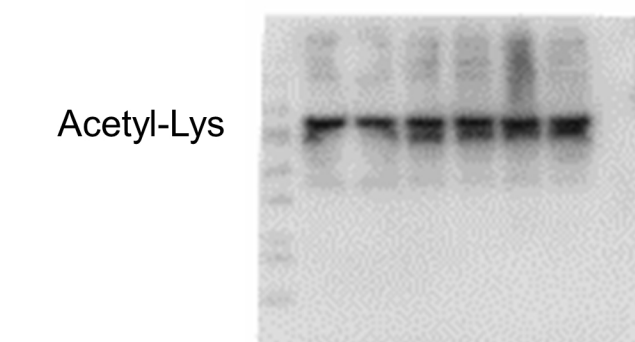

Supplementary Figure 3A

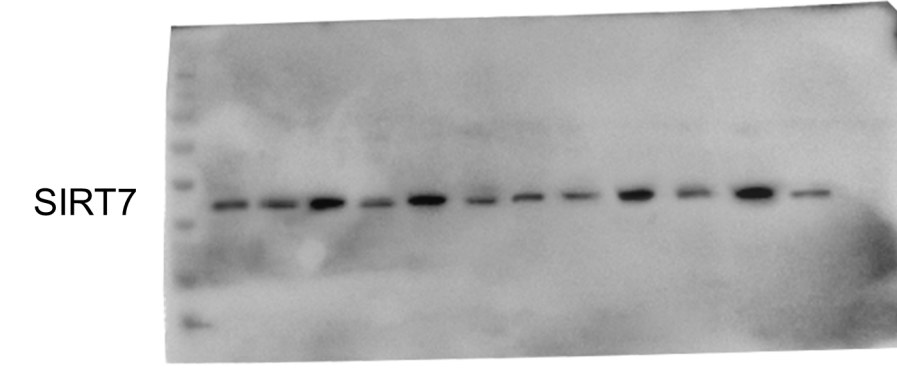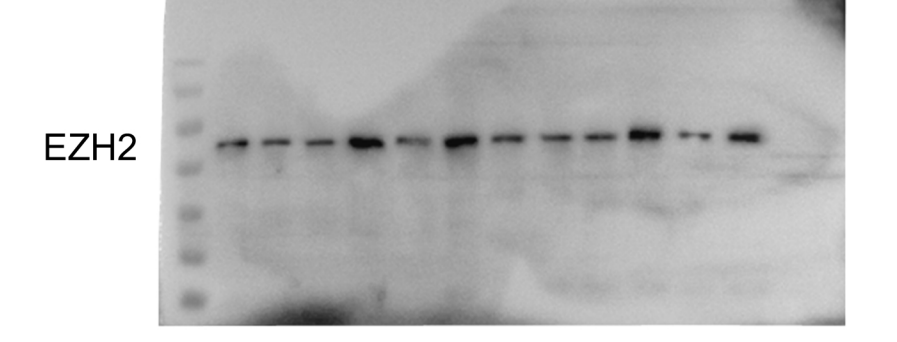

Figure 2D

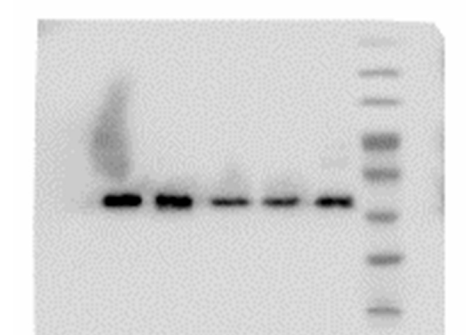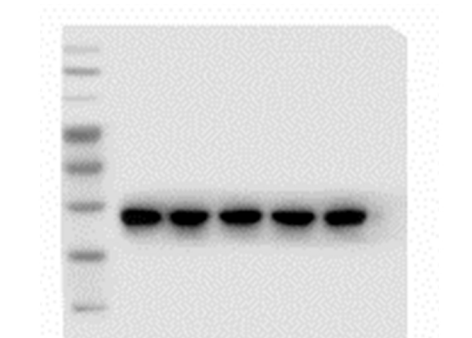

Figure 5B

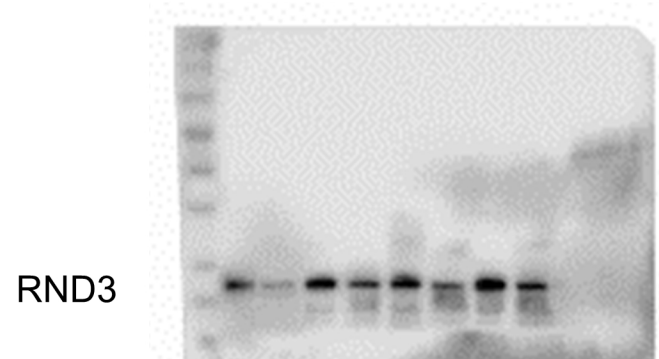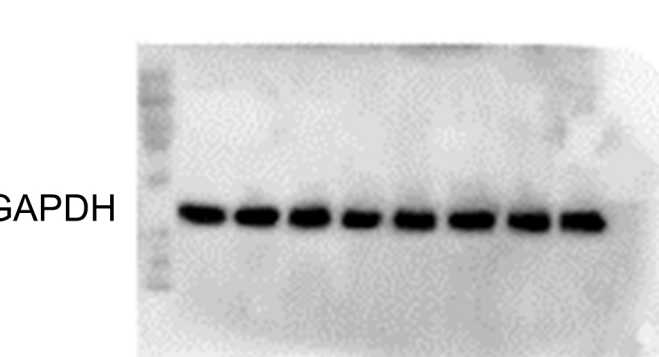

Figure 6G

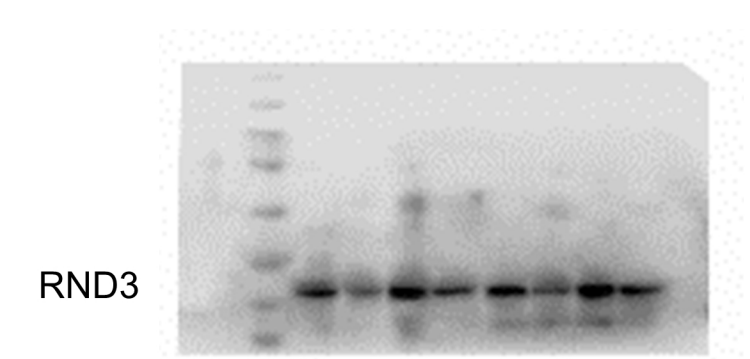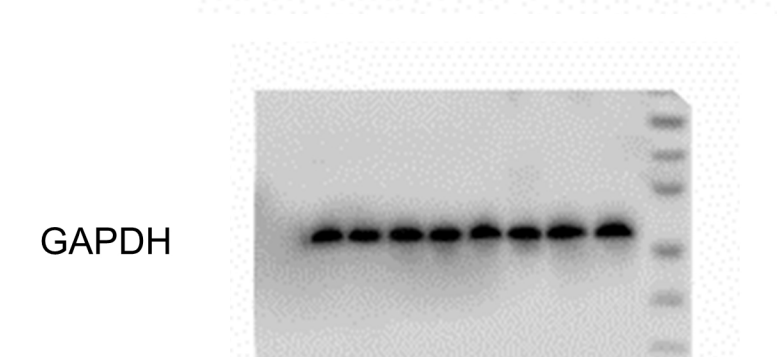

Figure 7H

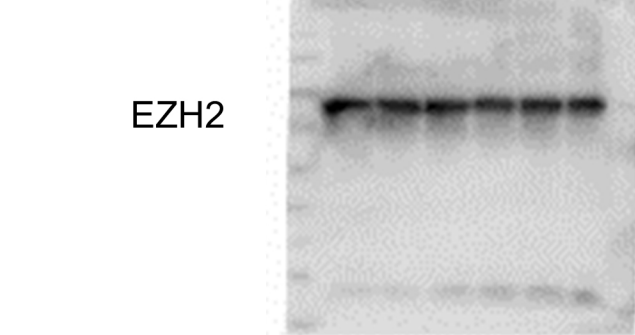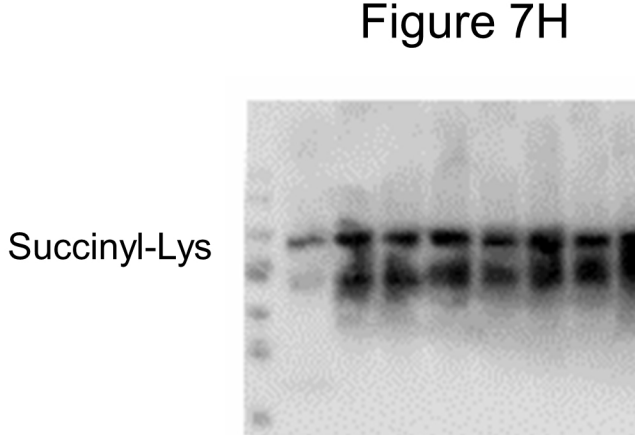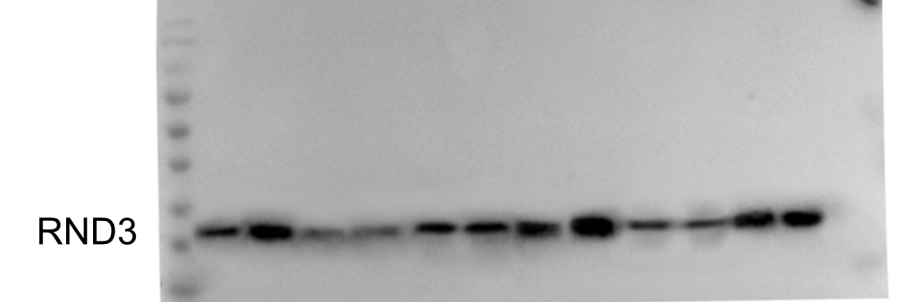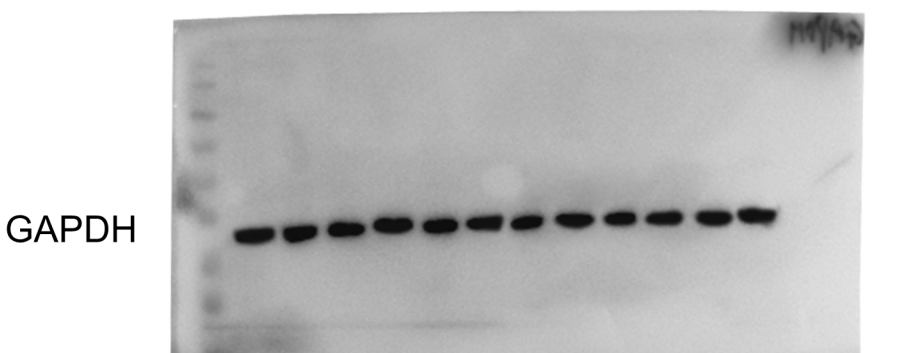

Figure 2E

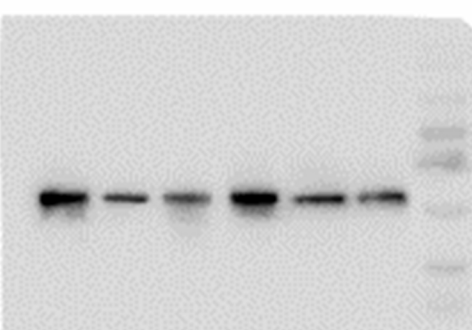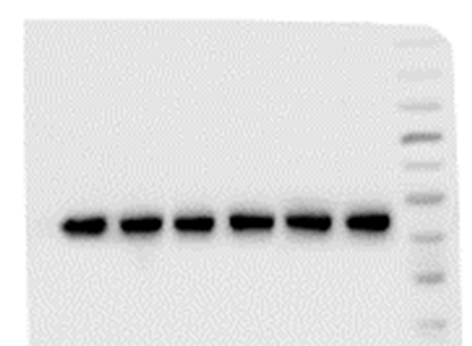

Figure 6A

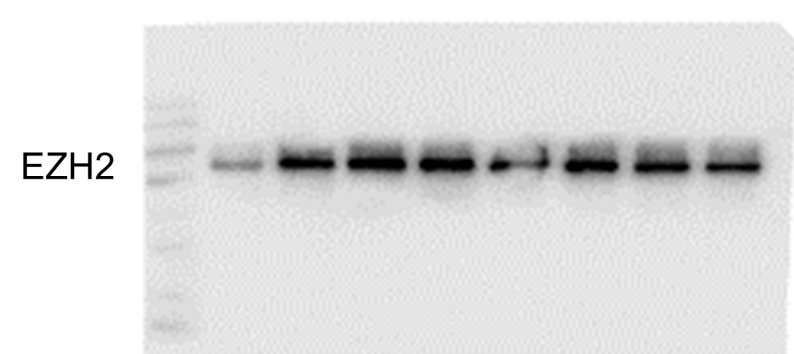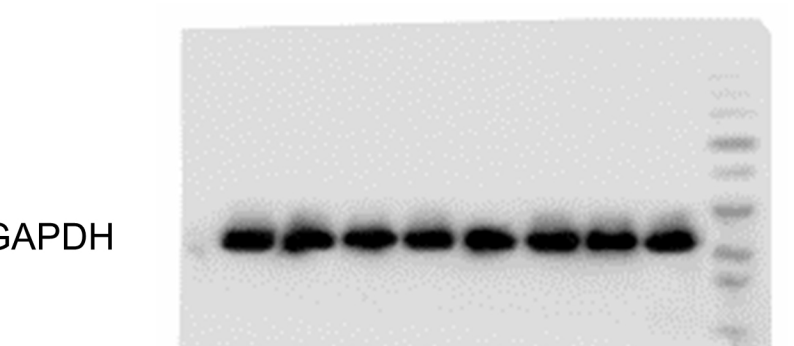

Figure 7F

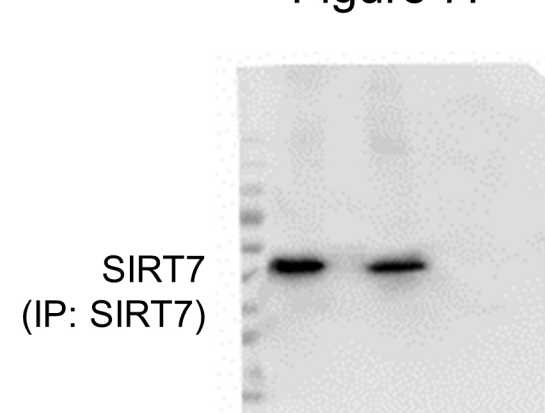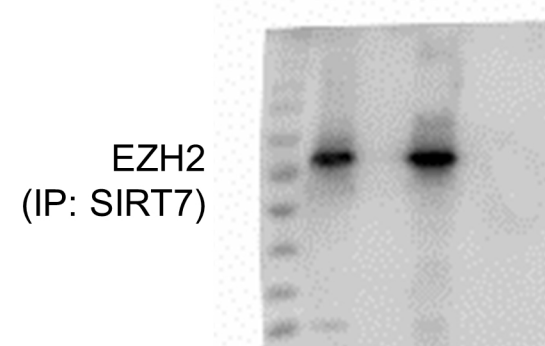

Figure 8A

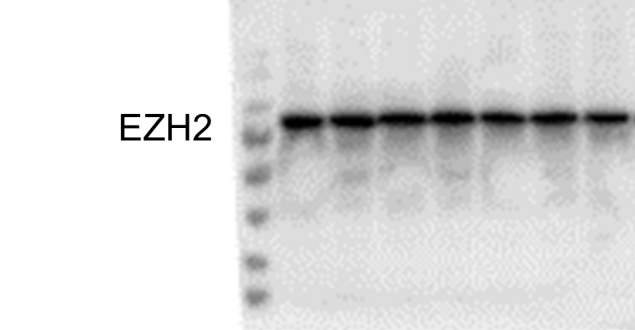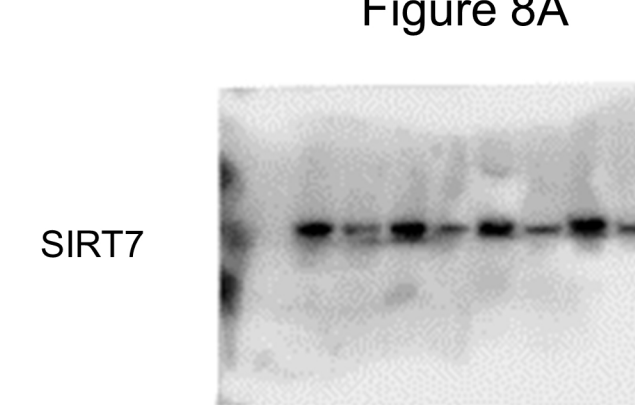

Figure 3E

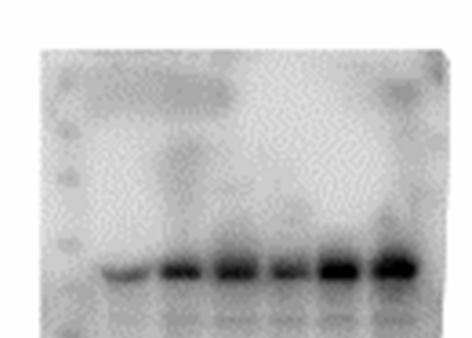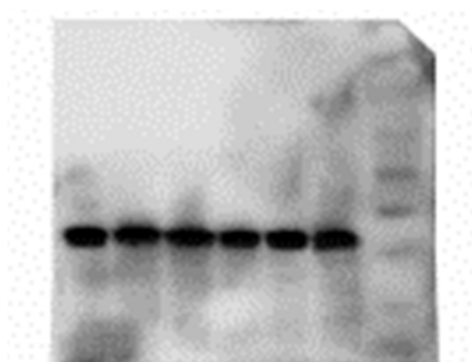

Figure 6C

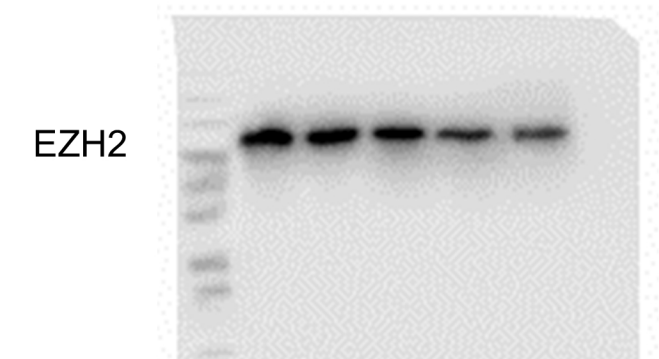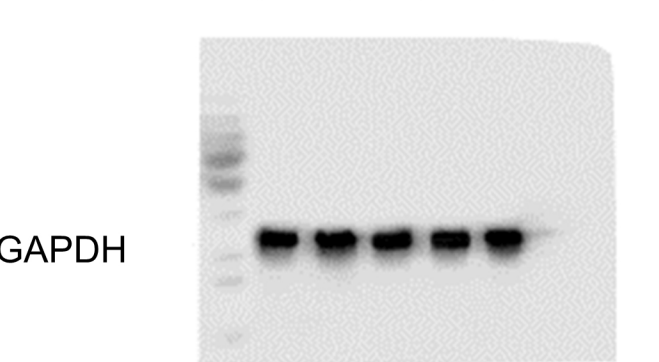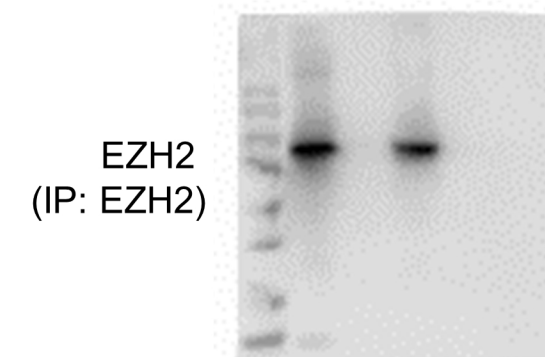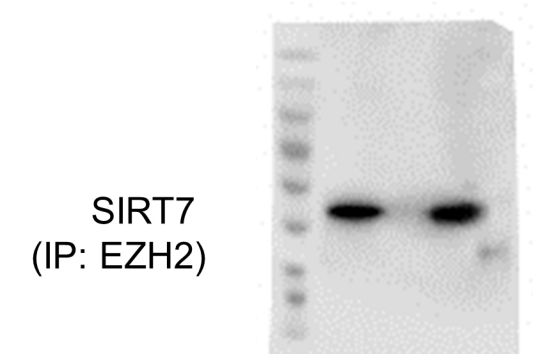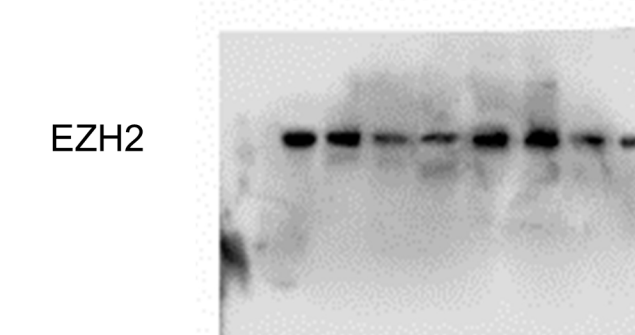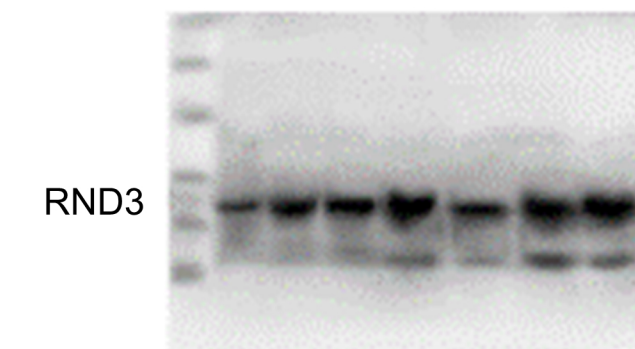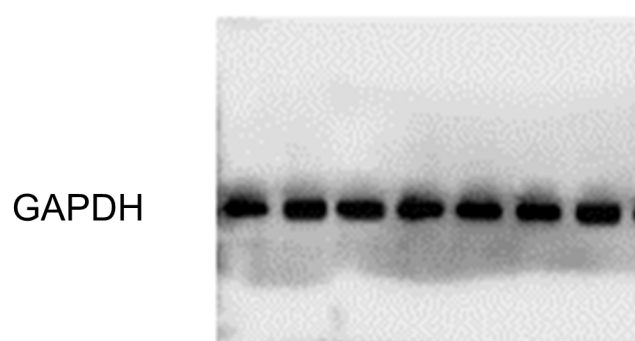

Supplement: Supplementary file 6 — WB Original Data [file 41419_2024_7321_MOESM6_ESM.pdf]
